# Supplementary material for: Large-scale, thick, self-assembled, nacre-mimetic brick-walls as fire barrier coatings on textiles
Source: PubMed Central journal article supplement (PMC5215295; doi:10.1038/srep39910), 2017-01-05
Supplement: srep39910-s1.pdf [file srep39910-s1.pdf]

# Supplementary Information for:

## Large-scale, thick, self-assembled, nacre-mimetic brick-walls as fire barrier coatings on textiles

Paramita Das, Helga Thomas, Martin Moeller, Andreas Walther\*

DWI – Leibniz-Institute for Interactive Materials, Forckenbeckstr. 50, 52056 Aachen, Germany

Correspondence and requests for materials should be addressed to A.W.

(email: [walther@dwi.rwth-aachen.de](mailto:walther@dwi.rwth-aachen.de)).

### Content:

1. SEM images of the CMC<sub>60</sub>MTM<sub>40</sub>-1% coated fabric

2

## 1. SEM images of the CMC60MTM40-1% coated fabric

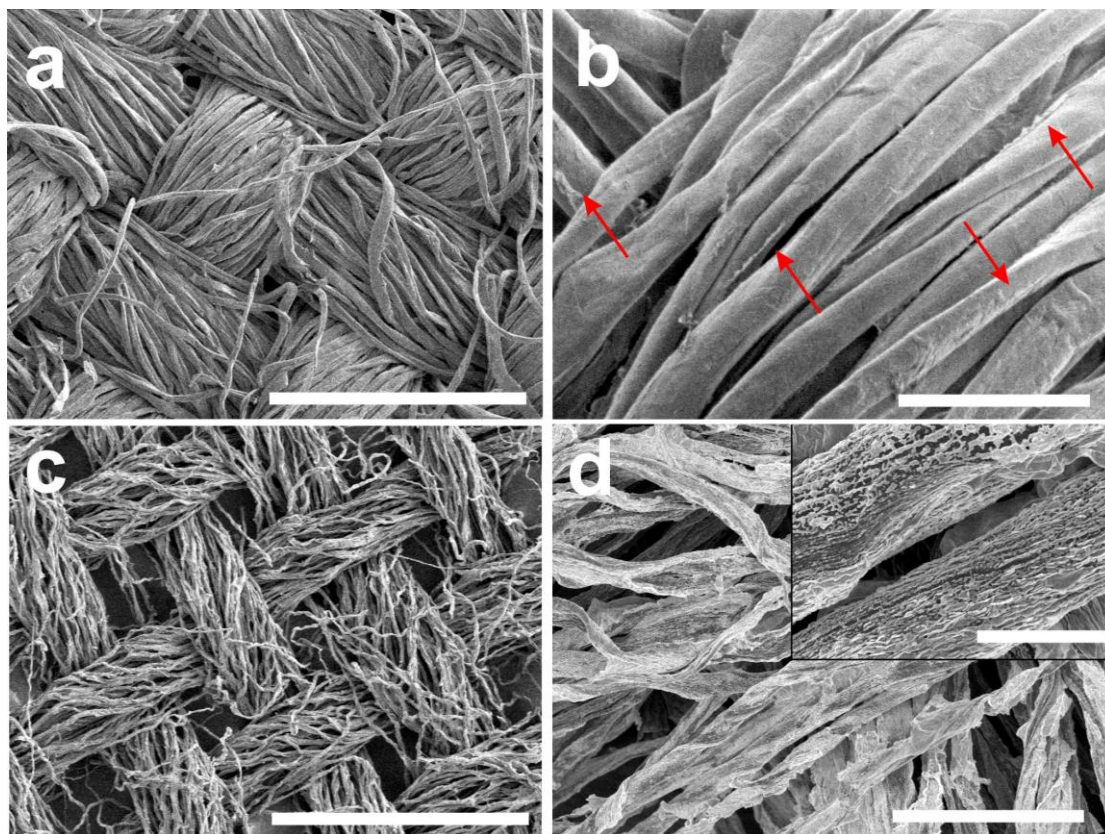

**Supplementary Figure S1. SEM images of the CMC60MTM40-1% coated fabric.** (a-d) Surface of CMC60MTM40-1%, (a,b) before burning, and (c,d,inset) after burning. The arrows guide the eye to locate rougher areas of the conformal coating of individual fibers (a,c, scale bar 500  $\mu\text{m}$ ; b,d, scale bar 50  $\mu\text{m}$ , inset of d, scale bar 5  $\mu\text{m}$ ).
